# Supplementary material for: Mechanism of cellular uptake of genotoxic silica nanoparticles
Source: PubMed Central journal article supplement (PMC3479067; doi:10.1186/1743-8977-9-29), 2012-07-23
Supplement: 1743-8977-9-29-S5.pdf [file 1743-8977-9-29-S5.pdf]

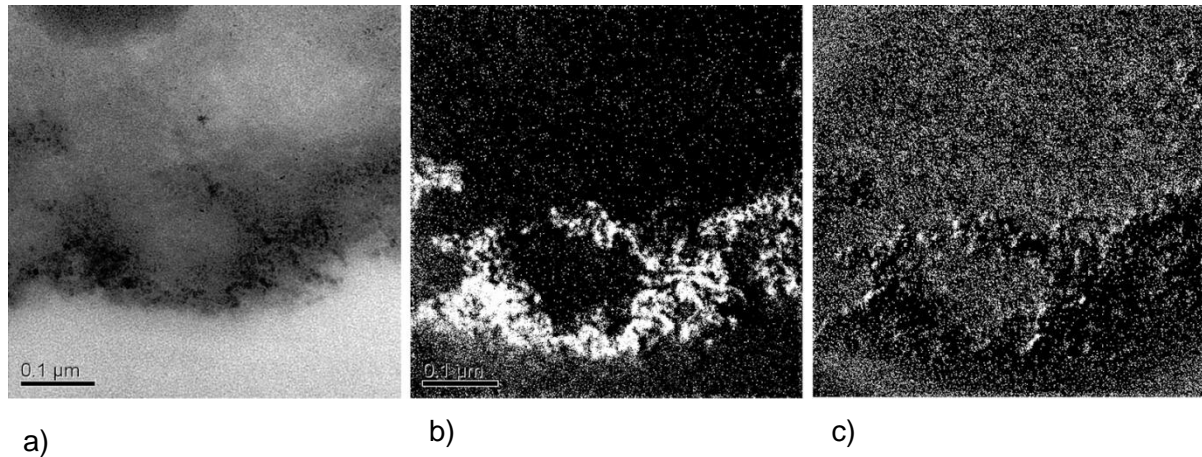

a) Higher magnification bright field TEM image of A549 cells incubated at 4 °C for 30 min with a 100 μg/ml of silica nanoparticles .

b) Si  $L_{2,3}$ -edge, energy filtered (EF-) TEM elemental map confirming the penetration of the silica NPs into the cell alongside dispersion along the membrane (bright regions correspond to Si-rich areas)

c) P  $L_{2,3}$ -edge, EF-TEM elemental map distinguishing the cell from the resin support (again bright regions correspond to P-rich areas)

EF-TEM elemental maps were recorded using the standard three window technique described in Brydson, Electron Energy Loss Spectroscopy, BIOS: Oxford, (2001).
