# Supplementary material for: Mechanism of cellular uptake of genotoxic silica nanoparticles
Source: PubMed Central journal article supplement (PMC3479067; doi:10.1186/1743-8977-9-29), 2012-07-23
Supplement: 1743-8977-9-29-S6.pdf [file 1743-8977-9-29-S6.pdf]

Mu Q et al

Additional File 6

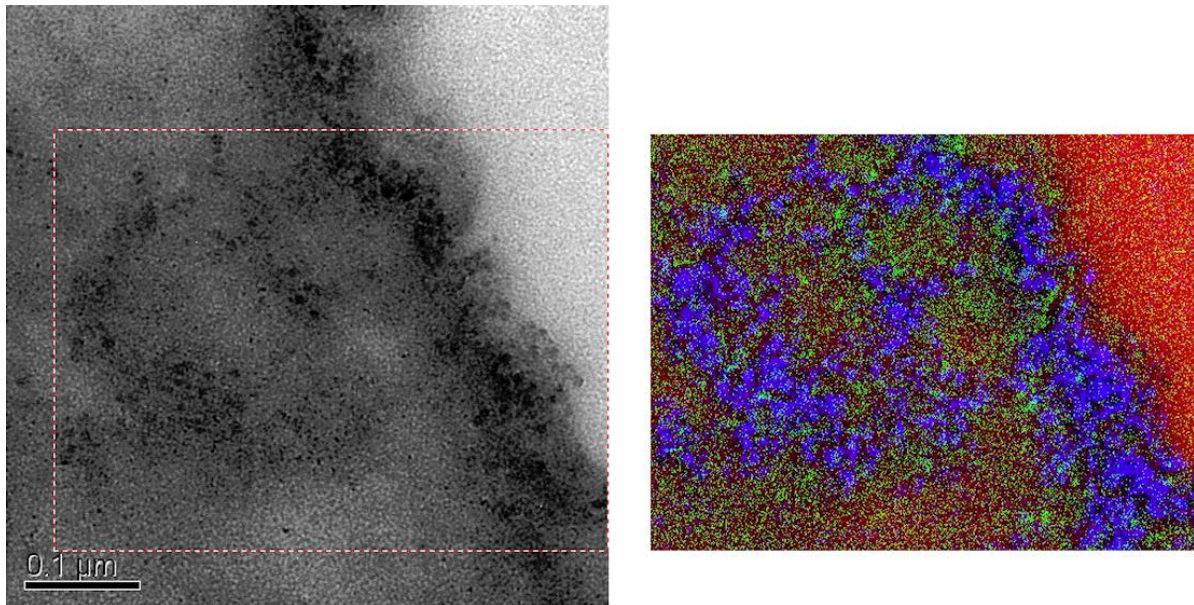

Red = BF Image Green = P map Blue = Si Map

a) Higher Magnification bright field TEM image of A549 cell incubated at 4 °C for 30 min with a 100  $\mu\text{g/ml}$  of silica nanoparticles .

b) False colour composite map of boxed region in a), showing the relative distribution of Si (blue) and P (green) and again confirming the penetration of the silica NPs into the cell alongside dispersion along the membrane.

EF-TEM elemental maps were recorded as described in additional file 5 and then false coloured and overlaid to produce the image in b).
